# Supplementary material
Source: Springer Nature journal article supplement (https://www.springermedizin.de/resource/supplementary/13601_2012_292_MOESM7_ESM.pdf/9677824)

**a** naive

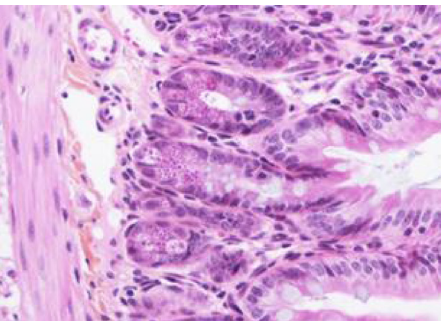

**b** Sham

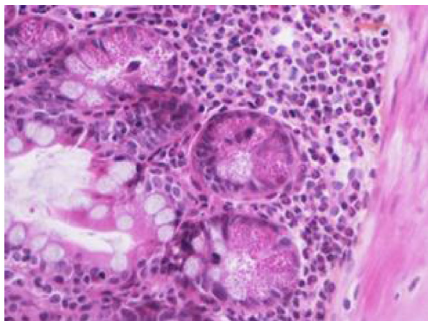

**c** EPIT

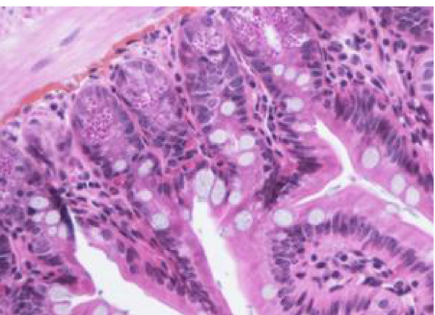

**d** stripping + EPIT

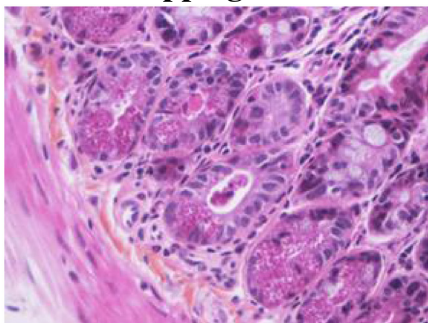

**e** eosinophil infiltration into jejunum

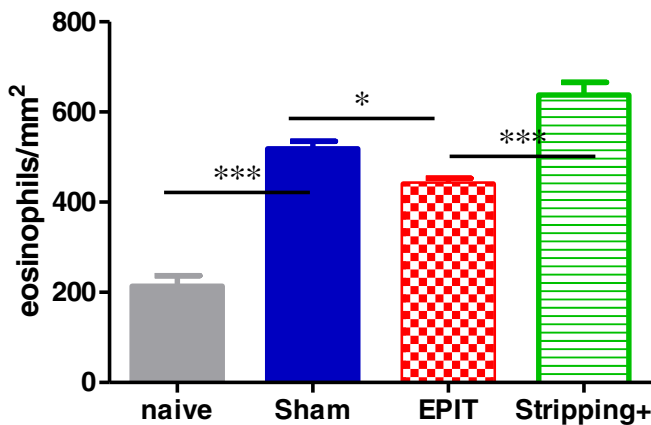

Supplement: MOESM7 [file 9677824]
